# Supplementary material for: Degradation and residue dynamics of fluazinam in diverse indian soil types and water pH conditions: a comprehensive study using kinetic models
Source: Frontiers journal article supplement (doi:10.3389/fenvs.2024.1394847), 2024-06-27
Supplement: Data_Sheet_3.xlsx [file Data_Sheet_3.xlsx]

## Sheet: Kinetics T1
t	mqt	pqt	cqt	jqt
0	0.913333	0.896667	0.923333	0.91
3	0.756667	0.75	0.8	0.786667
7	0.73	0.66	0.71	0.75
10	0.64	0.606667	0.623333	0.73
15	0.59	0.516667	0.52	0.656667
30	0.52	0.41	0.433333	0.6
45	0.446667	0.243333	0.286667	0.533333
60	0.29	0	0.193333	0.36
90	0.209667	0	0	0.27

## Sheet: Kinetics T1_p
t	pqt
0	0.896667
3	0.75
7	0.66
10	0.606667
15	0.516667
30	0.41
45	0.243333

## Sheet: Kinetics T1_c
t	cqt
0	0.923333
3	0.8
7	0.71
10	0.623333
15	0.52
30	0.433333
45	0.286667
60	0.193333

## Sheet: Kinetics T2
t	mqt	cqt	jqt
0	1.79667	1.9	1.82667
3	1.52333	1.577	1.58333
7	1.43	1.39333	1.53333
10	1.28333	1.23967	1.44667
15	1.19667	1.053	1.28333
30	1.05667	0.878	1.20333
45	0.893333	0.592667	1.03333
60	0.6	0.436	0.723333
90	0.426667	0.196667	0.54

## Sheet: Kinetics T2_p
t	pqt
0	1.80333
3	1.55
7	1.37
10	1.24
15	1.04667
30	0.866667
45	0.53
60	0.366667

## Sheet: Kinetics T1_Water
t	Fqt	Sqt	Nqt
0	0.9	0.85	0.84
3	0.76	0.65	0.54
7	0.73	0.57	0.38
10	0.7	0.54	0.25
15	0.68	0.48	0.14
30	0.65	0.4	0
45	0.63	0.24	0
60	0.58	0.19	0
90	0.49	0	0

## Sheet: Kinetics T1_Water_S
t	Sqt
0	0.85
3	0.65
7	0.57
10	0.54
15	0.48
30	0.4
45	0.24
60	0.19

## Sheet: Kinetics T1_Water_N
t	Nqt
0	0.84
3	0.54
7	0.38
10	0.25
15	0.14

## Sheet: Kinetics T2_Water
t	Fqt	Sqt	Nqt
0	1.8	1.78	1.75
3	1.56	1.42	1.04
7	1.51	1.14	0.74
10	1.44	1.1	0.52
15	1.35	1.01	0.3
30	1.3	0.87	0.14
45	1.25	0.56	0
60	1.13	0.4	0
90	1.08	0.23	0

## Sheet: Kinetics T2_Water_N
t	Nqt
0	1.75
3	1.04
7	0.74
10	0.52
15	0.3
30	0.14

[truncated: 3 more sheets: All_Soil, All_Water, Data_Raw]
