# Supplementary material for: Degradation and residue dynamics of fluazinam in diverse indian soil types and water pH conditions: a comprehensive study using kinetic models
Source: Frontiers journal article supplement (doi:10.3389/fenvs.2024.1394847), 2024-06-27
Supplement: Data_Sheet_4.docx [file Data_Sheet_4.docx]

**Degradation and Residue Dynamics of Fluazinam in Various Indian Soils and Water pH: Implications for Environmental Safety and Agricultural Practice**

Soumyadeep Mukhopadhyay1+, Jajati Mandal2+, Bappaditya Kanrar3, Debasish Chatterjee4*, Anjan Bhattacharyya5, Santanu Majumder4*

1Mitra SK Pvt Ltd, Udayan Industrial Estate, Beliaghata, West Bengal, India

2School of Science, Engineering and Environment, University of Salford, Salford, United Kingdom

3TLabs, Tea Research Association, Kolkata, West Bengal, India

4Department of Chemistry, University of Kalyani, Kalyani, Nadia, West Bengal, India

5Department of Agricultural Chemicals, Bidhan Chandra Krishi Viswavidyalaya, Mohanpur, West Bengal, India

6Department of Life and Environmental Sciences, Bournemouth University (Talbot Campus), Fern Barrow, Poole, United Kingdom.

*Corresponding authors:

Email: [debashis.chatterjee.ku@googlemail.com](mailto:debashis.chatterjee.ku@googlemail.com)

Email: [smajumder@bournemouth.ac.uk](mailto:smajumder@bournemouth.ac.uk)

+These authors contributed equally to this work.

Table S1. Physico-chemical characteristics of the soils

| **Physico-chemical properties of soil** | **Lateritic soil** | **Alluvial**  **soil** | **Coastal saline soil** | **Black**  **soil** | **Methods** |
| --- | --- | --- | --- | --- | --- |
| Soil order | Alfisol | Inceptisol | Inceptisol | Vertisol | --- |
| Location | Jhargram | Mohanpur | Canning | Pune | --- |
| pH | 5.45 | 7.02 | 7.60 | 8.14 | Jackson, 1973 |
| Organic Carbon (%) | 0.64 | 1.00 | 1.03 | 0.67 | Walkley and Black, 1934 |
| Percentage of sand | 54 | 12 | 50 | 16 | Bouyoucos, 1962 |
| Percentage of silt | 16 | 65 | 23 | 24 |
| Percentage of clay | 30 | 23 | 27 | 60 |

Figure S1: Chromatograms of (a) analytical standard of fluazinam (b) untreated control water sample and (c) water sample spiked with fluazinam.

Figure S2: Chromatograms of (a) untreated control soil sample and (b) soil sample spiked with fluazinam

**
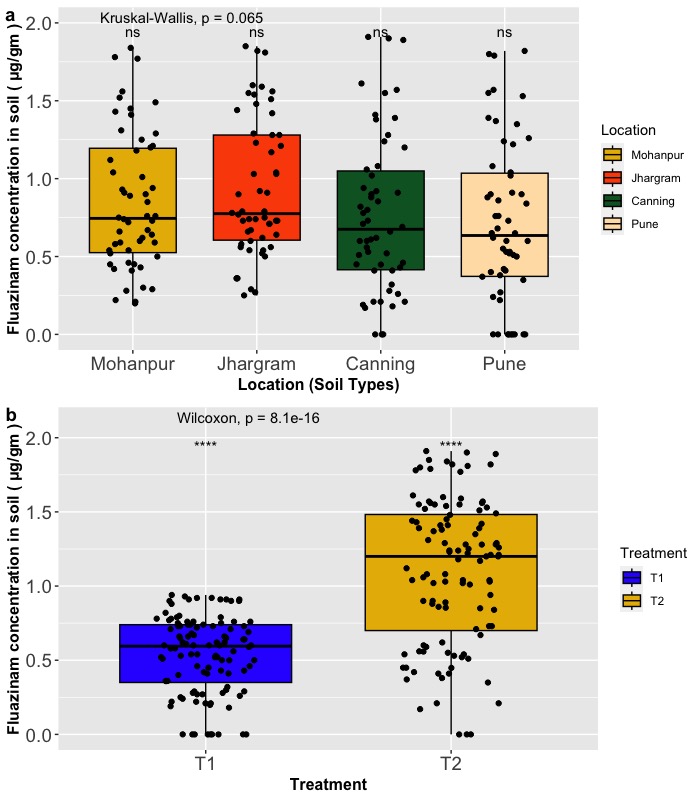
**

Figure S3. Comparison of dissipation of Fluazinam from (a) different soil types irrespective of treatments incubation days and (b) with respect to treatments irrespective of soil types and incubation days.

**
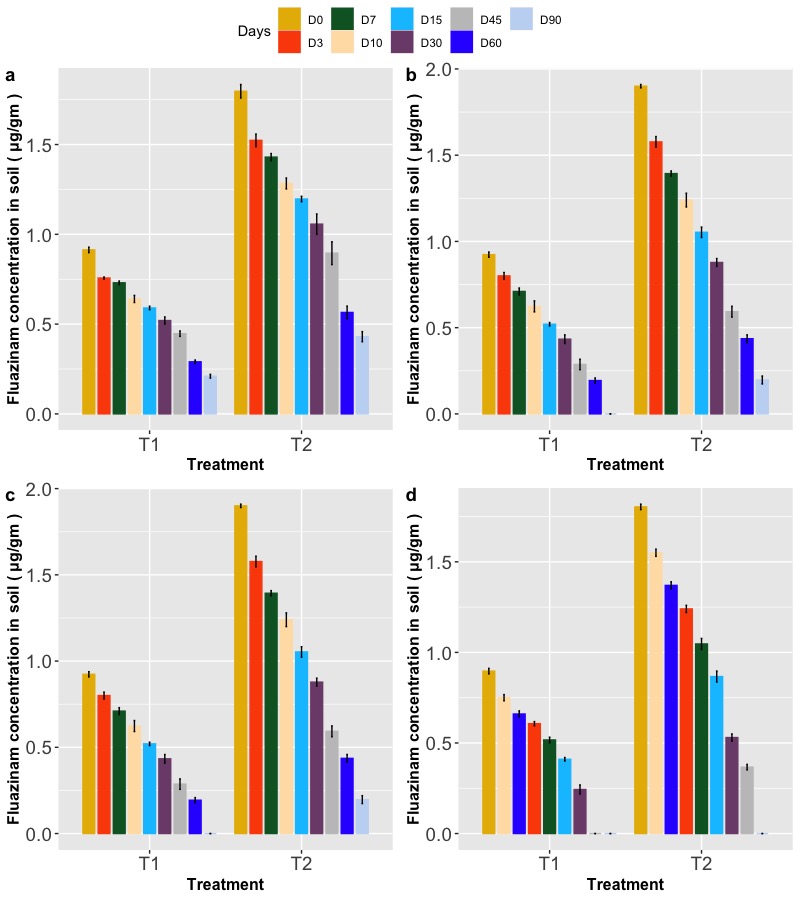
**

Figure S4. Dissipation of Fluazinam from (a) alluvial, (b) lateritic, (c) coastal saline and (d) black soil at different day’s interval.


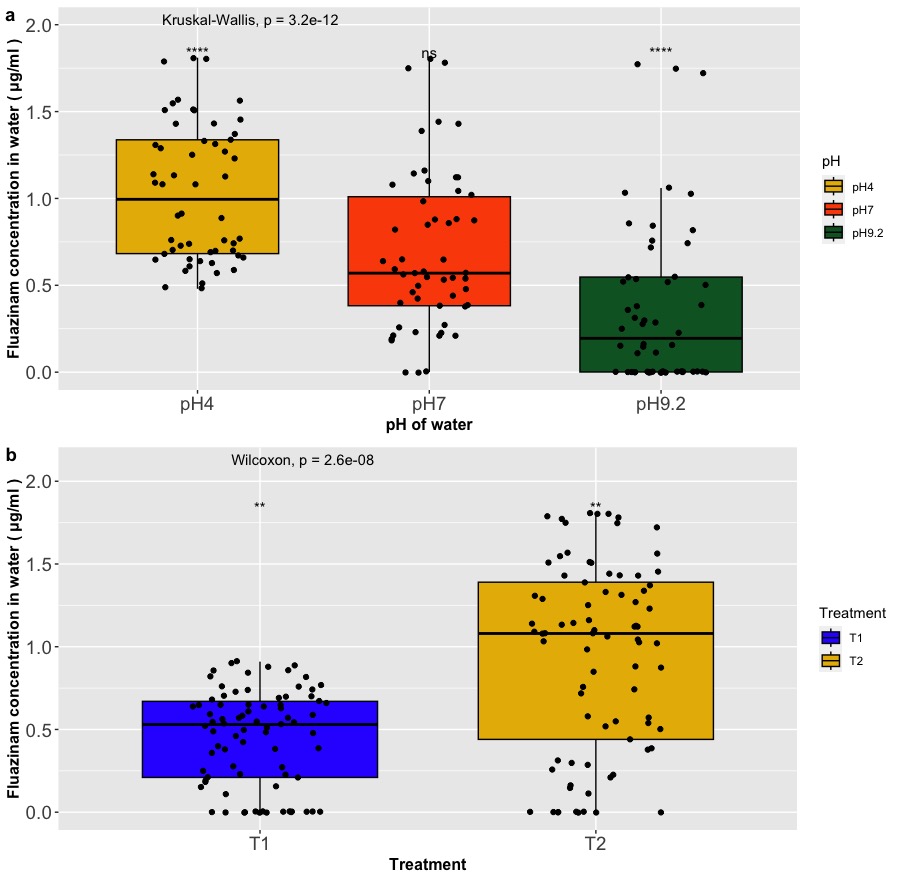


Figure S5. Comparison of dissipation of Fluazinam at (a) different pH of water irrespective of treatments and (b) with respect to treatments irrespective of water pH.

**
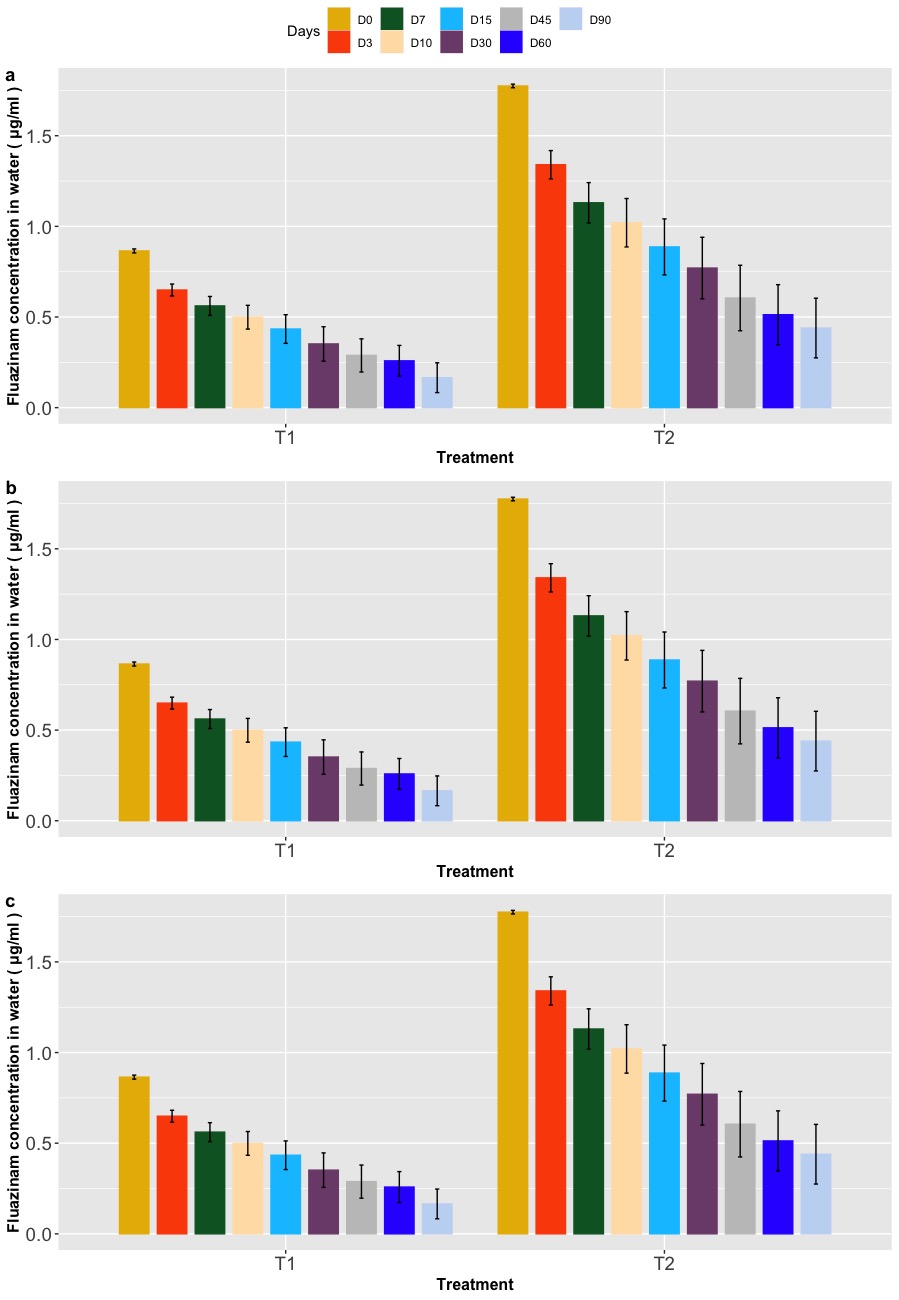
**

Figure S6. Dissipation of Fluazinam from water at (a) pH 4.0, (b) pH 7.0 and (c) pH 9.0 at different day’s interval

**References**

Bouyoucos, G. J. (1962): Hydrometer method improved for making particle size analyses of soils. *Agron. J.* 54(5),464-465.

Jackson, M.L. (1973). Soil Chemical Analysis. Prentice Hall India Pvt.Ltd., New Delhi, p. 498.

Walkley, A., Black, I. A. (1934): An examination of the Degtjareff method for determining soil organic matter, and a proposed modification of the chromic acid titration method. *Soil sci*. 37(1), 29-38.
